# Supplementary material for: Exploring the relationship between surface PM 2.5 and meteorology in Northern India
Source: Copernicus journal article supplement (doi:10.5194/acp-2018-24), 2018-03-05
Supplement: Supplementary file 1 [file acp-2018-24-supplement.pdf]

**Table S1.** Heterogeneous uptake coefficients.

| Species                            | Gamma  |
|------------------------------------|--------|
| N <sub>2</sub> O <sub>5</sub>      | 0.1    |
| N <sub>2</sub> O <sub>5</sub> dust | 0.0    |
| NO <sub>3</sub>                    | 0.1    |
| NO <sub>3</sub> dust               | 0.0    |
| NO <sub>2</sub>                    | 0.0001 |
| NH <sub>3</sub>                    | 0.05   |
| HO <sub>2</sub>                    | 1.0    |

**Table S2.** Time series correlation of each station's observed total PM<sub>2.5</sub> with the individual components of modeled dry PM<sub>2.5</sub>, total dry PM<sub>2.5</sub>, and total wet PM<sub>2.5</sub> in the grid cell the station is located within. The last two columns show the normalized mean bias (%) of modeled dry and wet PM<sub>2.5</sub>. For each station, the component with the highest correlation is in bold.

| Site | Correlation of modeled component with daily averaged observed PM <sub>2.5</sub> |       |             |             |             |                 |                 |                 |                         |                         | Normalized Mean Bias    |                         |
|------|---------------------------------------------------------------------------------|-------|-------------|-------------|-------------|-----------------|-----------------|-----------------|-------------------------|-------------------------|-------------------------|-------------------------|
|      | Dust                                                                            | Salt  | BC          | OM          | SOA         | NH <sub>4</sub> | SO <sub>4</sub> | NO <sub>3</sub> | PM <sub>2.5</sub> (dry) | PM <sub>2.5</sub> (wet) | PM <sub>2.5</sub> (dry) | PM <sub>2.5</sub> (wet) |
| 1    | -0.36                                                                           | -0.46 | 0.51        | 0.53        | -0.18       | 0.53            | -0.17           | <b>0.67</b>     | 0.62                    | 0.61                    | 3.8                     | 28.1                    |
| 2    | -0.36                                                                           | -0.25 | 0.66        | <b>0.66</b> | -0.33       | 0.50            | -0.08           | 0.60            | 0.61                    | 0.60                    | -32.7                   | -18.7                   |
| 3    | -0.40                                                                           | -0.37 | <b>0.60</b> | 0.60        | -0.32       | 0.44            | -0.19           | 0.56            | 0.56                    | 0.55                    | -23.9                   | -7.8                    |
| 4    | -0.20                                                                           | -0.14 | 0.59        | <b>0.60</b> | -0.13       | 0.43            | -0.02           | 0.46            | 0.49                    | 0.47                    | -57.7                   | -48.8                   |
| 5    | -0.24                                                                           | -0.10 | <b>0.41</b> | 0.40        | 0.25        | 0.25            | 0.14            | 0.24            | 0.34                    | 0.33                    | -26.0                   | -10.3                   |
| 6    | 0.01                                                                            | 0.19  | <b>0.47</b> | 0.44        | 0.23        | 0.13            | -0.11           | 0.09            | 0.24                    | 0.21                    | -26.4                   | -10.3                   |
| 7    | -0.30                                                                           | -0.21 | 0.63        | <b>0.66</b> | -0.14       | 0.53            | 0.08            | 0.57            | 0.58                    | 0.57                    | -34.2                   | -20.3                   |
| 8    | -0.34                                                                           | -0.23 | 0.63        | <b>0.65</b> | -0.14       | 0.52            | 0.05            | 0.55            | 0.56                    | 0.55                    | -48.1                   | -37.2                   |
| 9    | -0.31                                                                           | -0.21 | 0.51        | <b>0.54</b> | -0.27       | 0.39            | -0.08           | 0.44            | 0.45                    | 0.44                    | -45.9                   | -34.6                   |
| 10   | -0.21                                                                           | -0.19 | 0.25        | 0.23        | -0.12       | <b>0.25</b>     | 0.10            | 0.18            | 0.21                    | 0.21                    | -31.2                   | -16.7                   |
| 11   | -0.29                                                                           | -0.21 | <b>0.32</b> | 0.30        | 0.06        | -0.14           | -0.03           | -0.24           | -0.12                   | -0.13                   | -52.3                   | -45.6                   |
| 12   | -0.33                                                                           | -0.24 | 0.66        | <b>0.68</b> | -0.19       | 0.53            | -0.03           | 0.55            | 0.57                    | 0.56                    | -39.9                   | -27.2                   |
| 13   | 0.27                                                                            | 0.07  | 0.23        | 0.21        | <b>0.53</b> | 0.21            | 0.27            | 0.22            | 0.28                    | 0.27                    | -36.7                   | -23.9                   |
| 14   | -0.23                                                                           | -0.16 | <b>0.44</b> | 0.43        | -0.15       | 0.35            | -0.11           | 0.36            | 0.35                    | 0.34                    | 13.4                    | 38.8                    |
| 15   | -0.40                                                                           | -0.30 | 0.45        | <b>0.48</b> | 0.10        | 0.38            | 0.09            | 0.41            | 0.37                    | 0.36                    | -50.0                   | -39.0                   |
| 16   | -0.15                                                                           | -0.22 | 0.29        | <b>0.31</b> | 0.05        | 0.18            | -0.18           | 0.21            | 0.16                    | 0.17                    | -47.5                   | -37.3                   |
| 17   | -0.38                                                                           | -0.22 | <b>0.66</b> | 0.65        | -0.26       | 0.54            | -0.02           | 0.56            | 0.58                    | 0.57                    | -30.5                   | -15.9                   |
| 18   | -0.35                                                                           | -0.17 | 0.63        | <b>0.64</b> | -0.18       | 0.50            | -0.05           | 0.56            | 0.57                    | 0.55                    | -21.0                   | -3.8                    |
| 19   | -0.25                                                                           | -0.16 | 0.58        | 0.58        | -0.25       | 0.53            | 0.06            | <b>0.62</b>     | 0.59                    | 0.58                    | -26.9                   | -11.0                   |
| 20   | -0.24                                                                           | -0.20 | <b>0.60</b> | 0.60        | -0.14       | 0.47            | 0.09            | 0.54            | 0.55                    | 0.54                    | -24.7                   | -8.4                    |
| 21   | -0.36                                                                           | -0.32 | 0.59        | 0.58        | -0.10       | 0.61            | 0.21            | 0.64            | <b>0.64</b>             | 0.64                    | -30.9                   | -15.8                   |
| 22   | -0.37                                                                           | -0.20 | 0.52        | <b>0.53</b> | -0.28       | 0.40            | -0.15           | 0.49            | 0.47                    | 0.46                    | -10.0                   | 9.5                     |

## Anthropogenic BC Emissions (TgC yr<sup>-1</sup>)

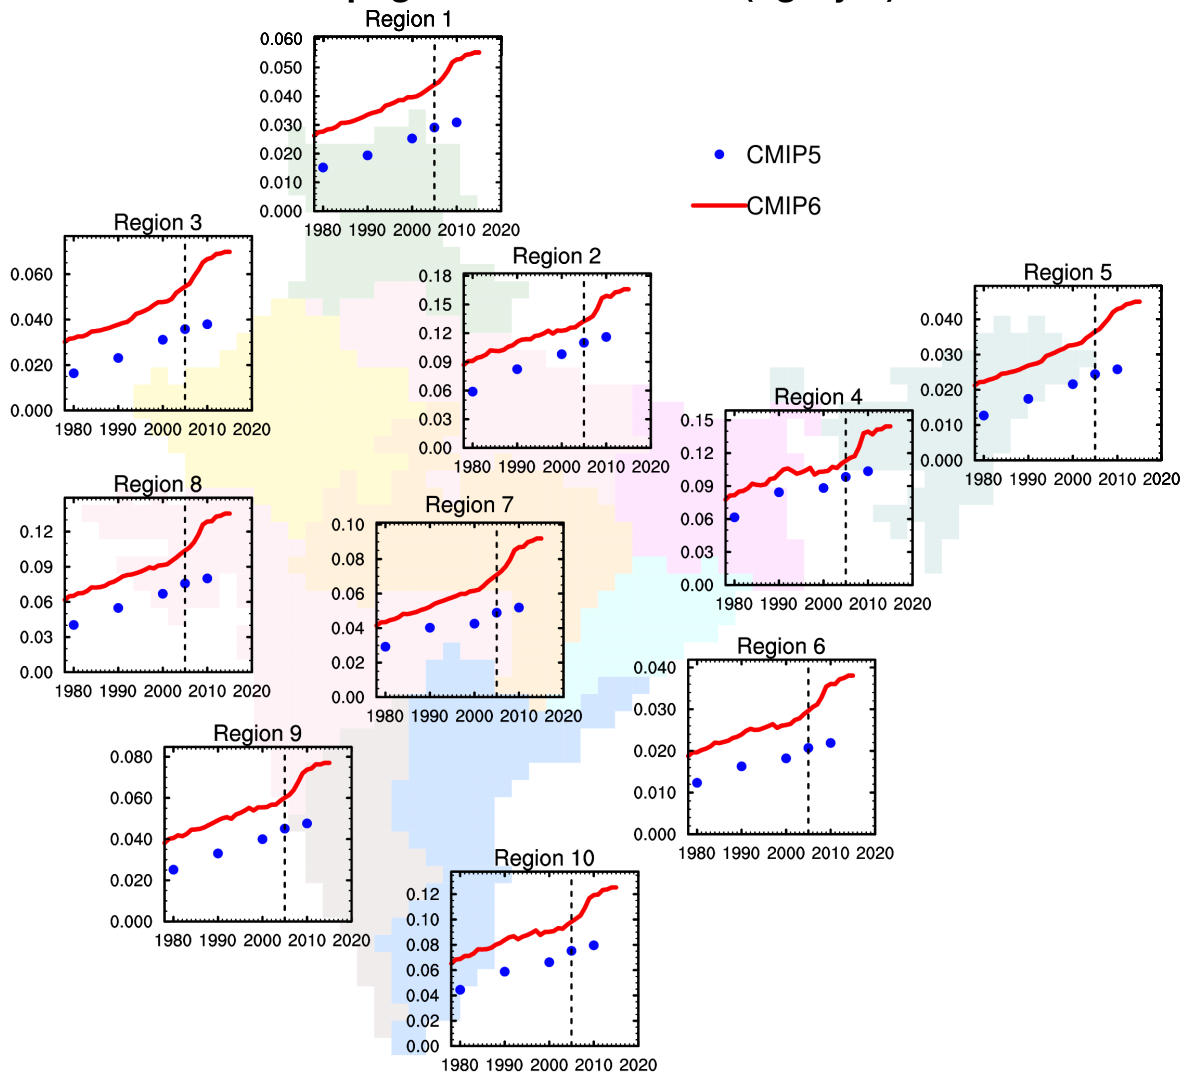

**Figure S1.** Time series (1980–2015) of anthropogenic black carbon emissions (TgC yr<sup>-1</sup>) over 10 regions of India for the CMIP5 inventory (blue dots) and CMIP6 inventory (red lines).

# Anthropogenic OM Emissions (Tg yr<sup>-1</sup>)

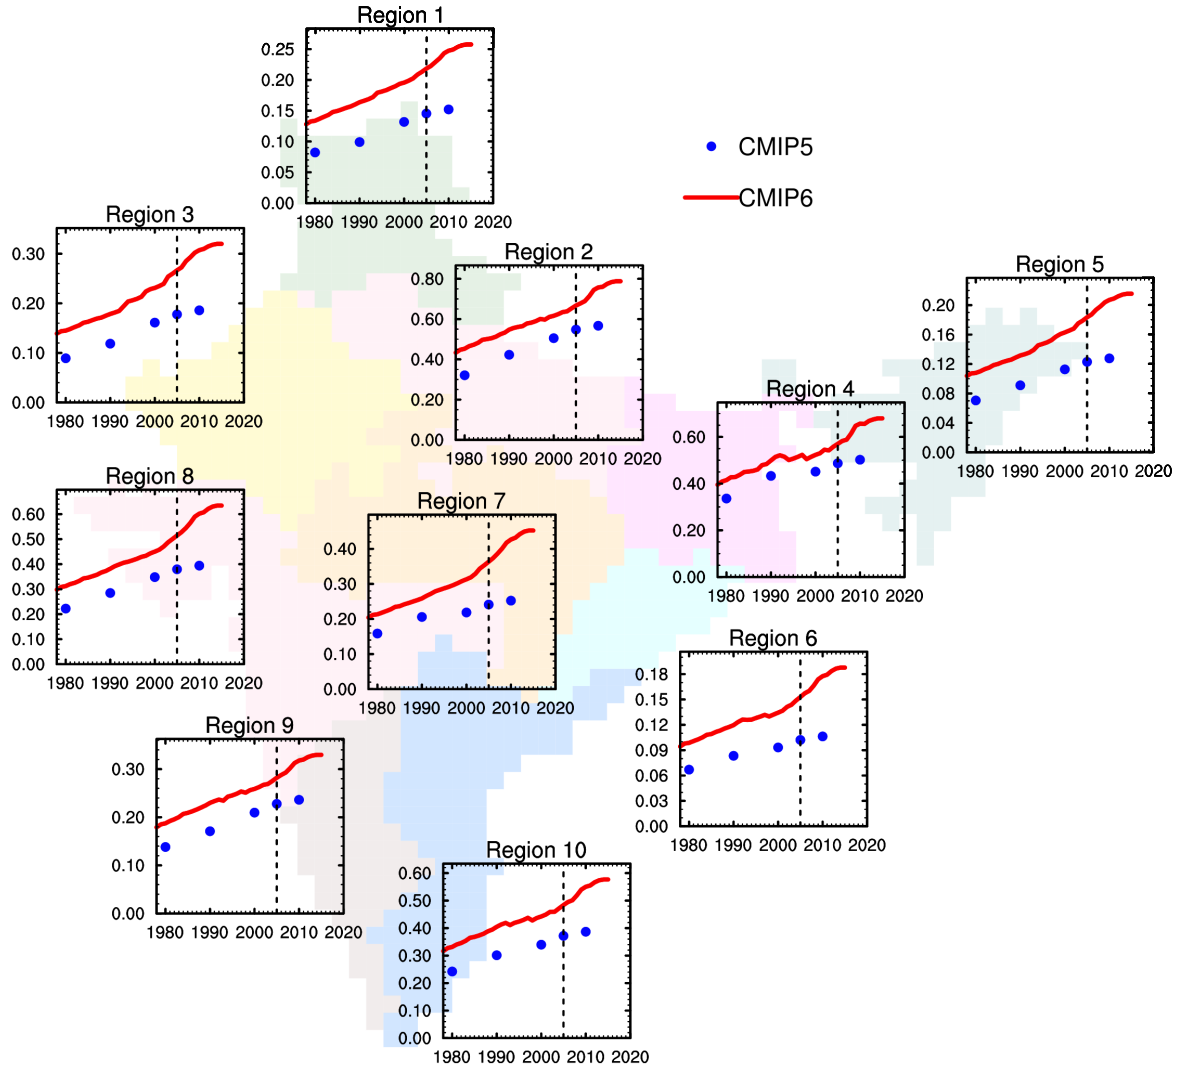

Figure S2. Same as Figure S1, but for organic matter (Tg yr<sup>-1</sup>)

# Anthropogenic NO Emissions (Tg yr<sup>-1</sup>)

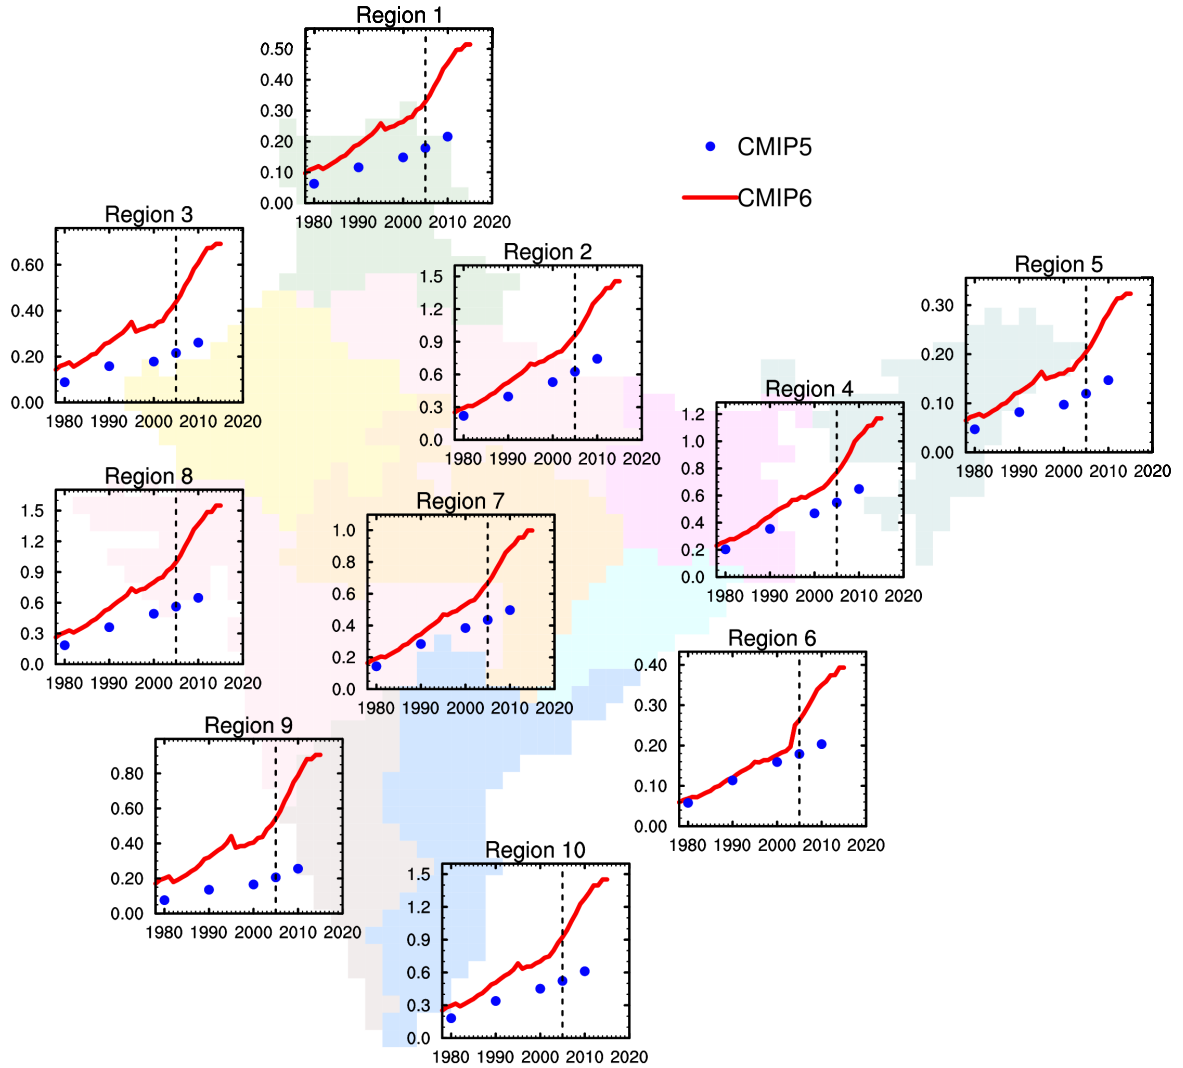

Figure S3. Same as Figure S1, but for NO (Tg yr<sup>-1</sup>)

# Anthropogenic SO<sub>2</sub> Emissions (Tg yr<sup>-1</sup>)

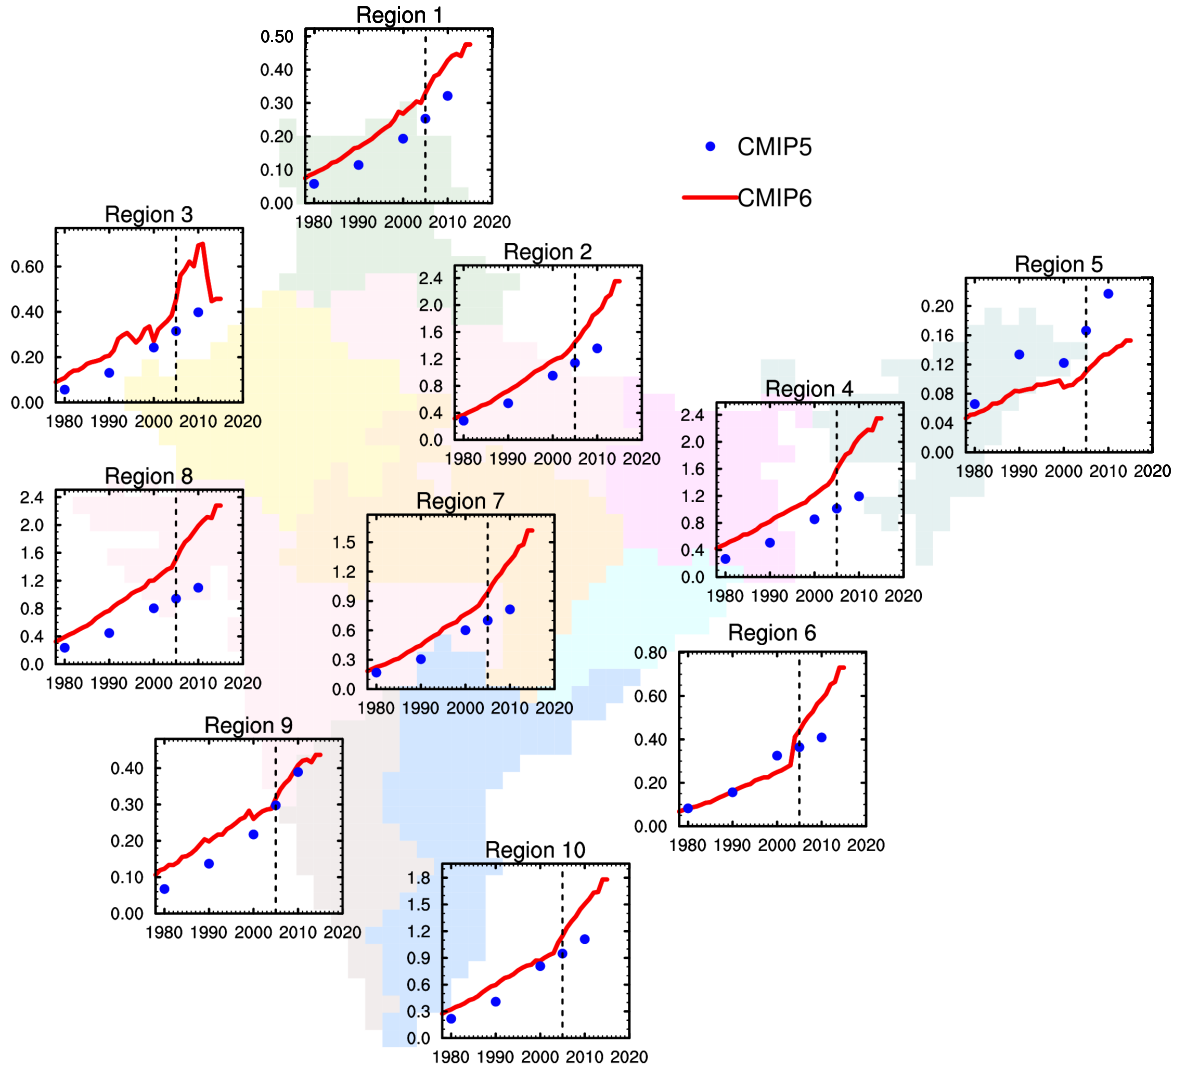

Figure S4. Same as Figure S1, but for SO<sub>2</sub> (Tg yr<sup>-1</sup>)



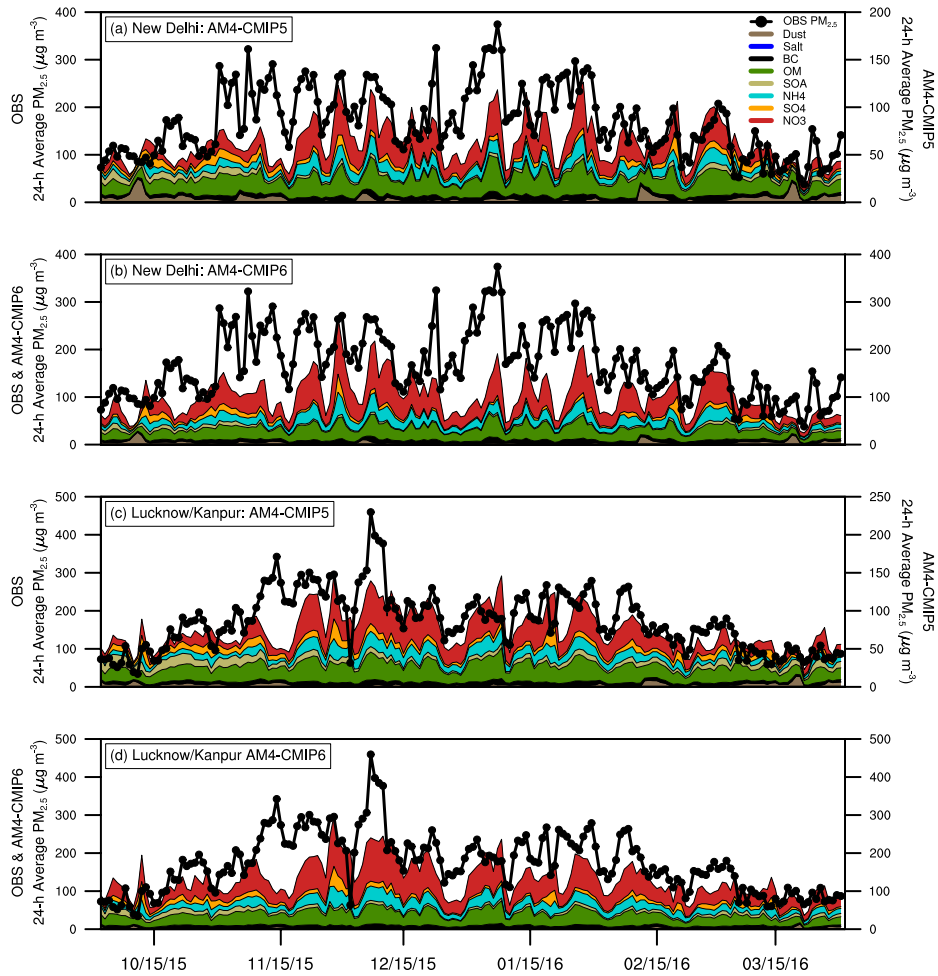

**Figure S6.** Six month time series of daily total observed  $PM_{2.5}$  (black) and modeled components (colors) over (a, b) New Delhi and (c, d) Lucknow/Kanpur, Uttar Pradesh for AM4-CMIP5 (a, c) and AM4-CMIP6 (b, d). Note the different y-axis scales in (a) and (c) for the AM4-CMIP5 versus the observations.

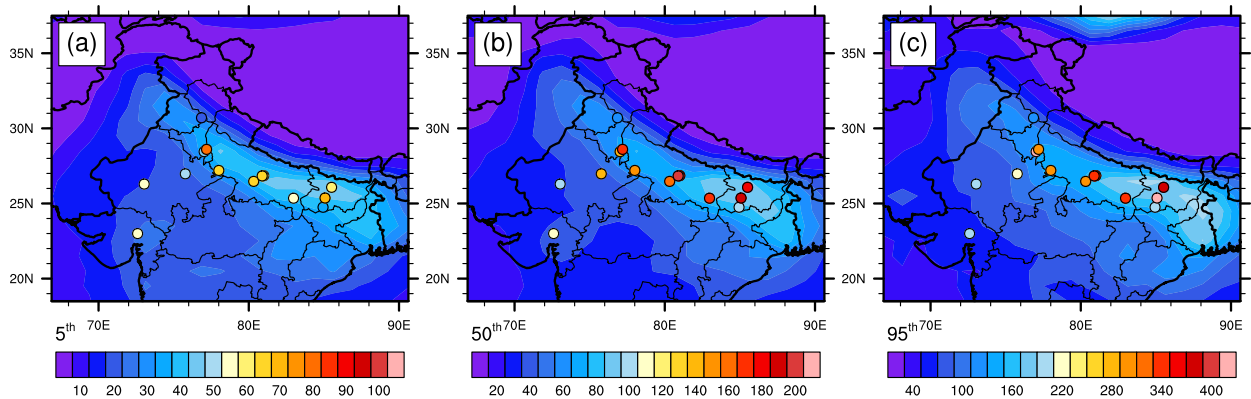

**Figure S7.** (a-b) 5th (c-d) 50th, and (e-f) 95th percentile of 24-h average  $PM_{2.5}$  ( $\mu g m^{-3}$ ) over 1 October 2015 – 31 March 2016 for the observations (circles), and the AM4-CMIP5-wet (grid).

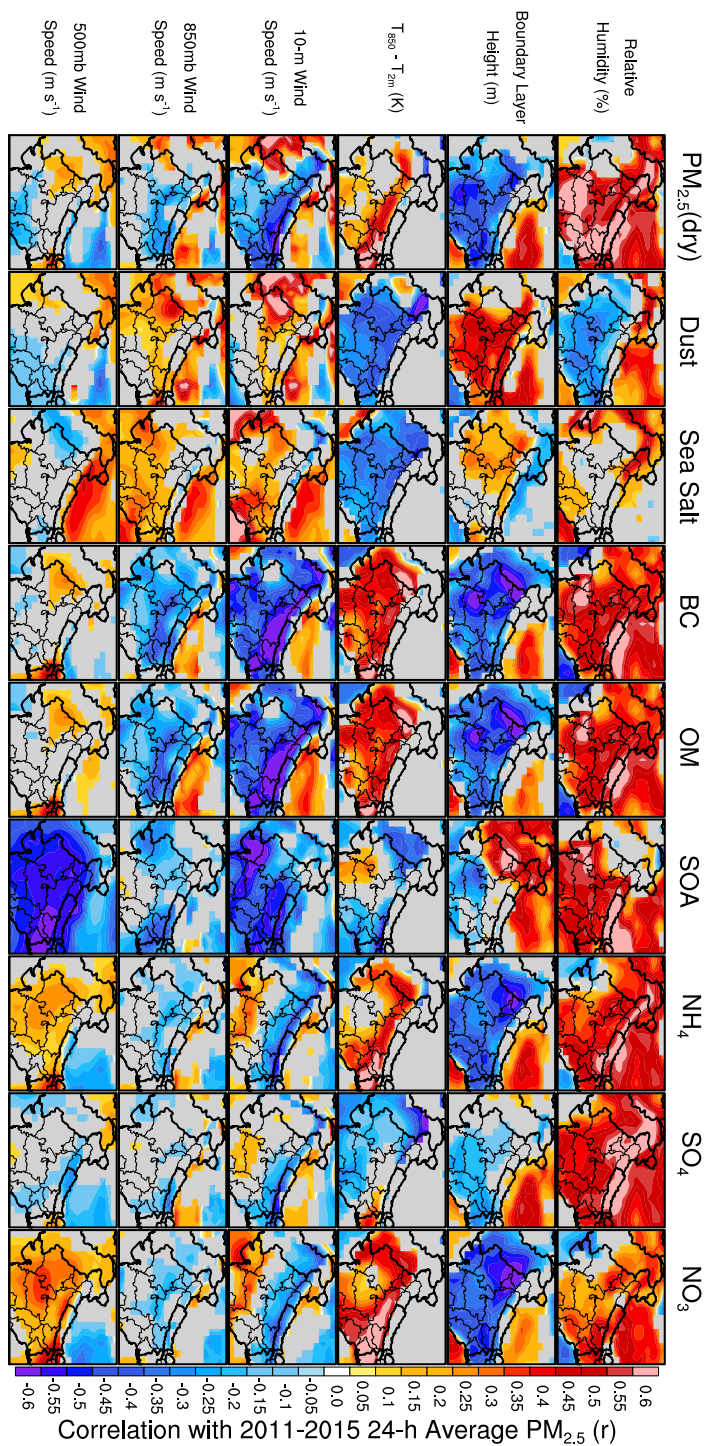

**Figure S8.** Correlation of daily average modeled dry  $PM_{2.5}$  and its components (columns) with the meteorological variables shown in Figure 4 (rows) over October–March, 2011–2015. Gray areas are where the correlation is not significant at the 95% confidence level.



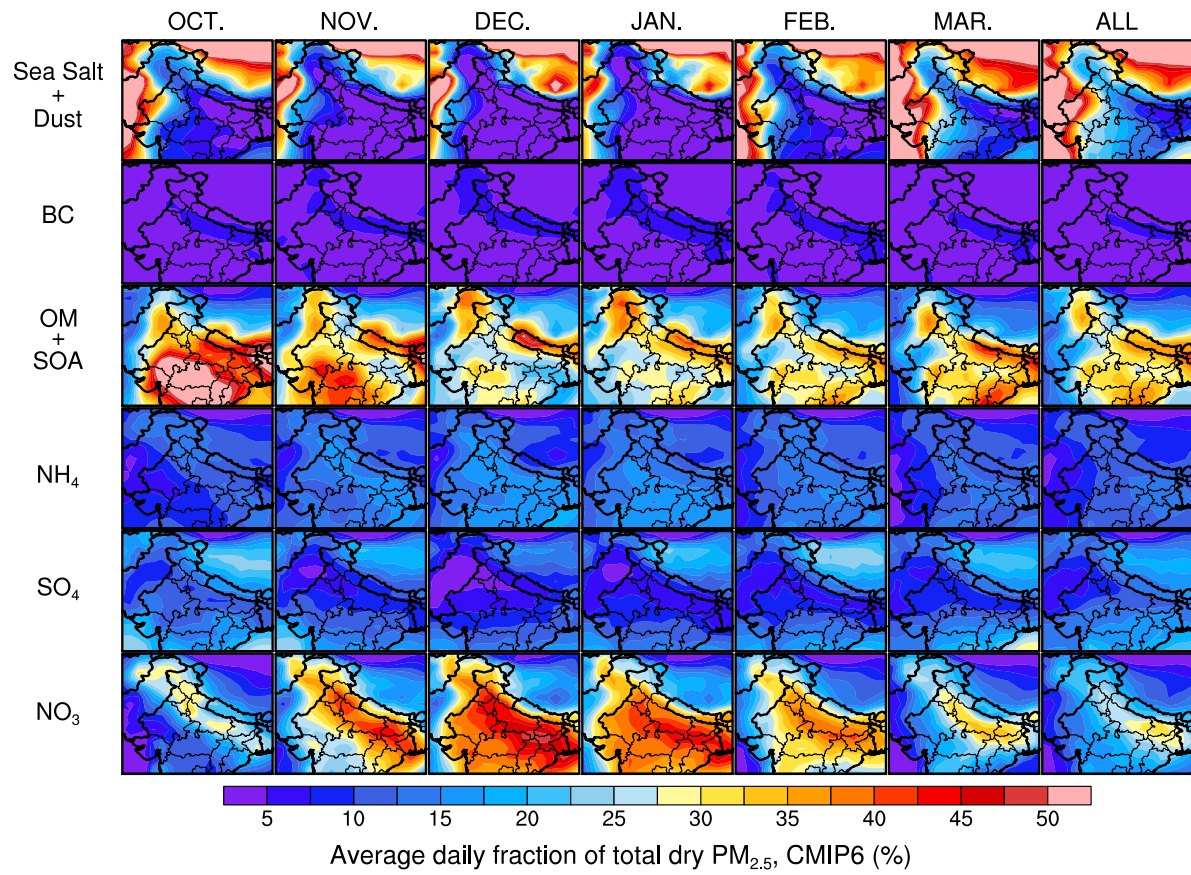

**Figure S9.** Average fraction of AM4-CMIP6 dry PM<sub>2.5</sub> for each of the major components (rows) for each month and the 6-month mean (columns) averaged over 2011–2015.

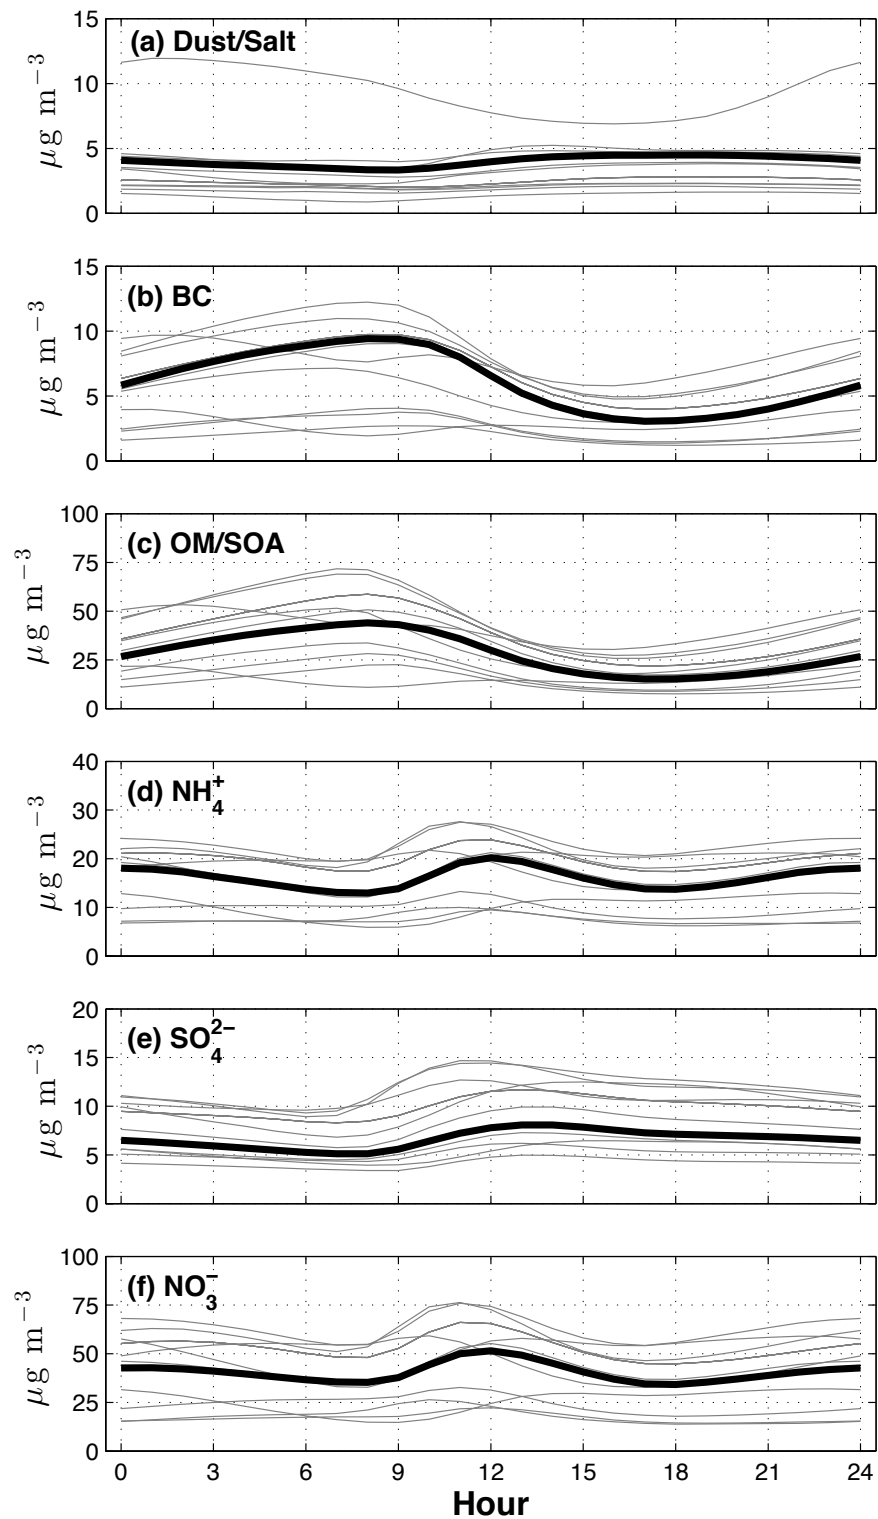

**Figure S10.** Diurnal cycles of the abundance ( $\mu\text{g m}^{-3}$ ) of (a) dust and sea salt, (b) black carbon, (c) organic matter and secondary organic aerosol, (d) ammonium, (e) sulfate, and (f) nitrate in AM4-CMIP6 for the individual grid cells where observations are located (gray) and their median (black) averaged over 1 October 2015 – 31 March 2016.

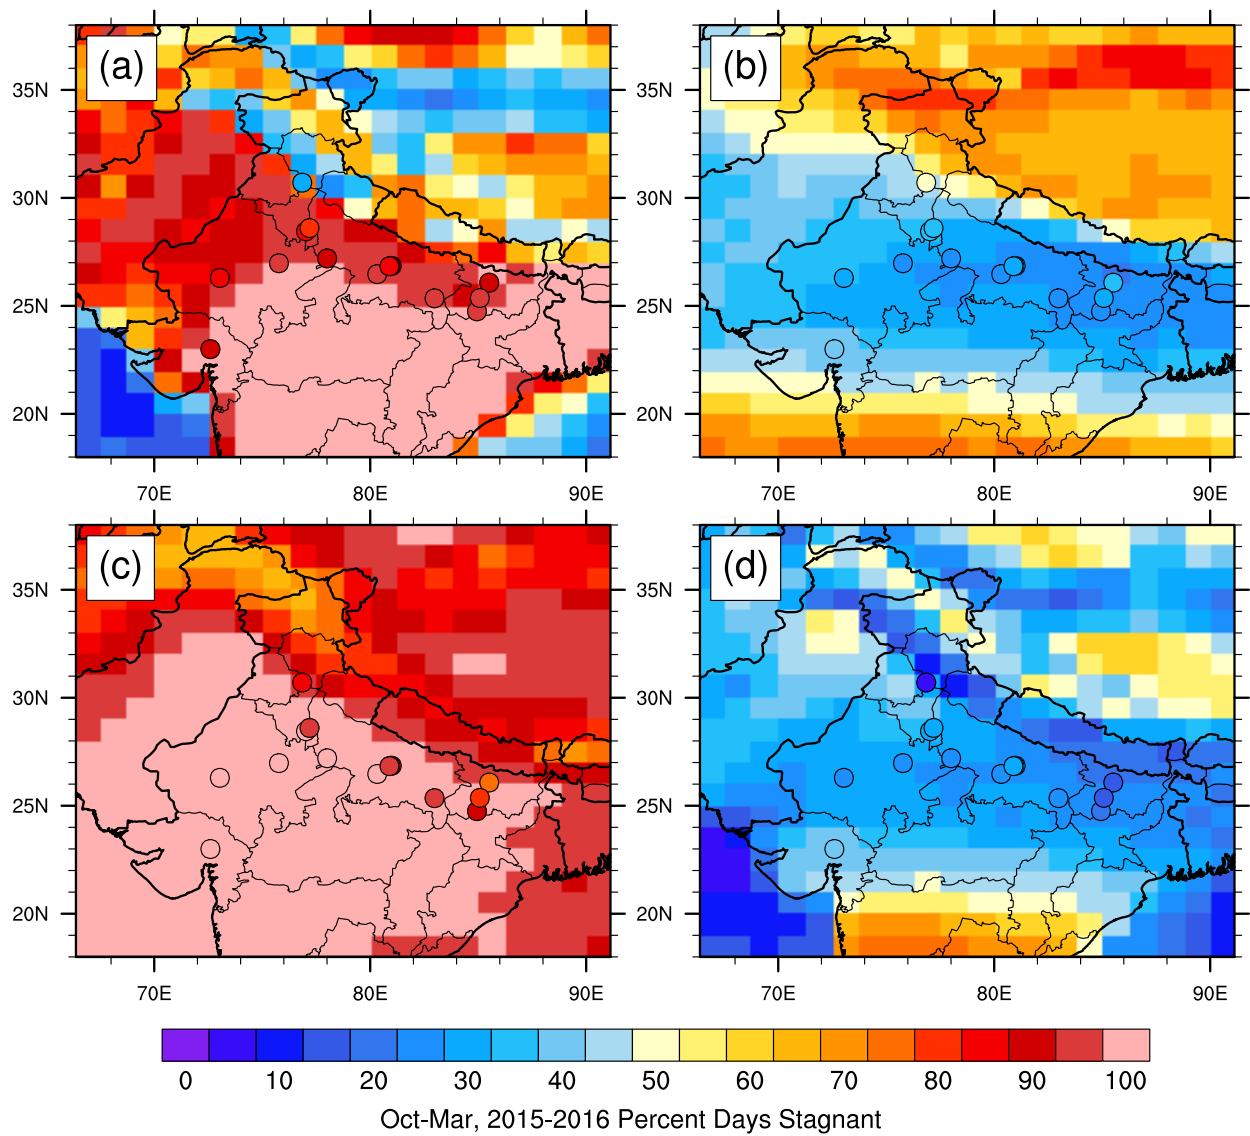

**Figure S11.** Percentage of October–March, 2015–2016 days that are considered stagnant with respect to (a) 10-m wind speed ( $< 3.2 \text{ m s}^{-1}$ ), (b) 500 mb wind speed ( $< 13.0 \text{ m s}^{-1}$ ), (c) precipitation ( $< 1.0 \text{ mm day}^{-1}$ ), and (d) all three; i.e. the ASI is met for the observations (circles) and the AM4-CMIP6 (background).

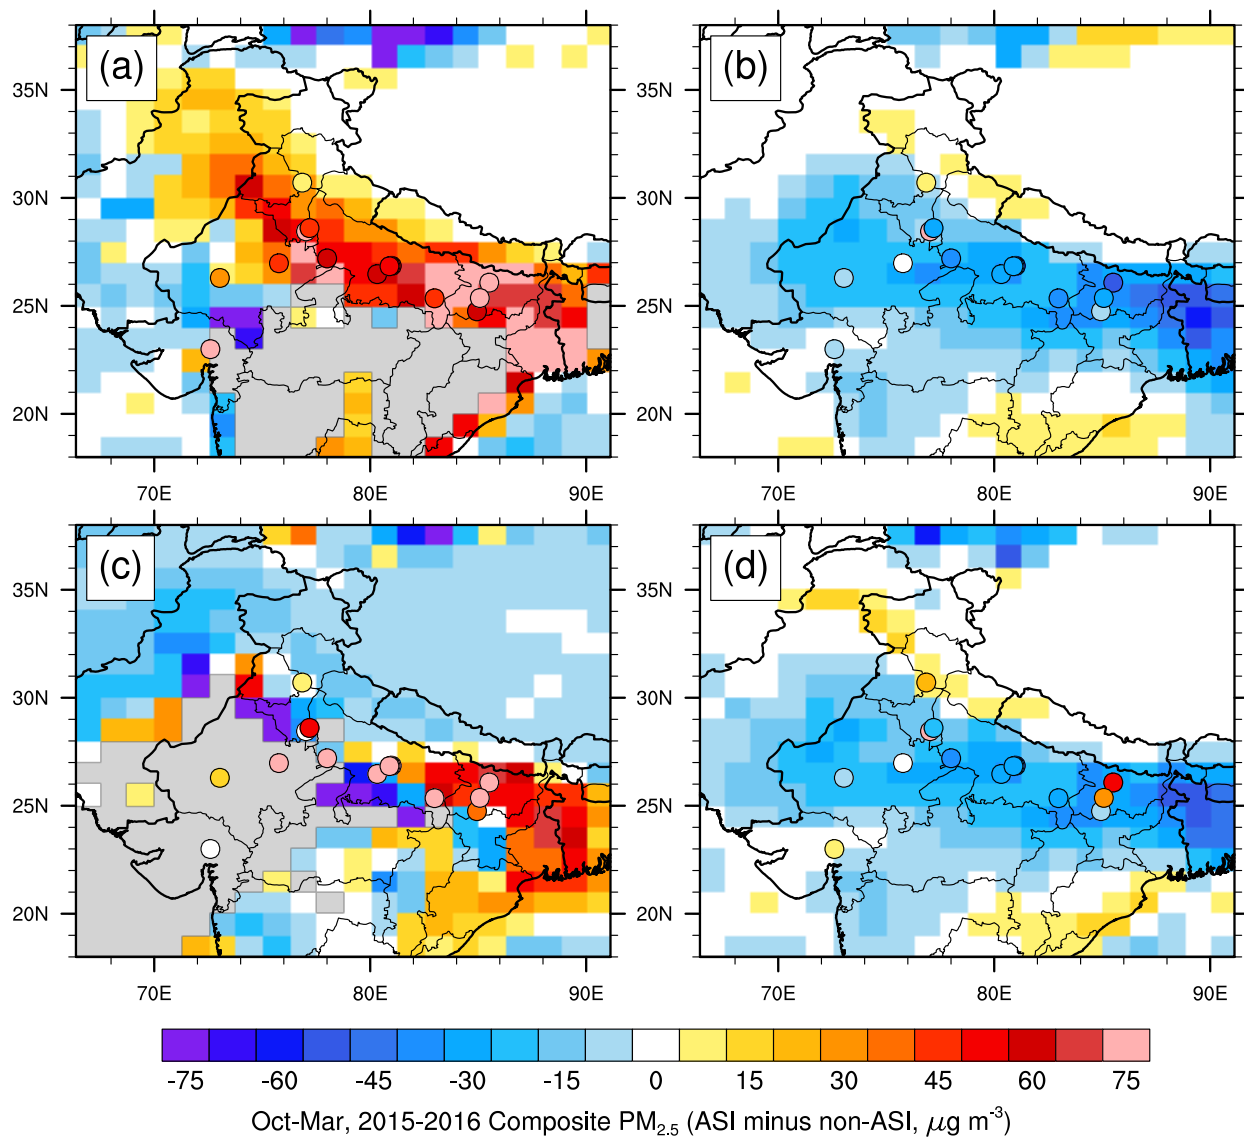

**Figure S12.** Composite of raw PM<sub>2.5</sub> on days when ASI components (a) 10-m wind speed, (b) 500 mb wind speed, (c) precipitation, and (d) total ASI are met minus days when they are not for October 2015 – March 2016. Gray areas are locations where a composite cannot be constructed since 100% of the days are considered stagnant.

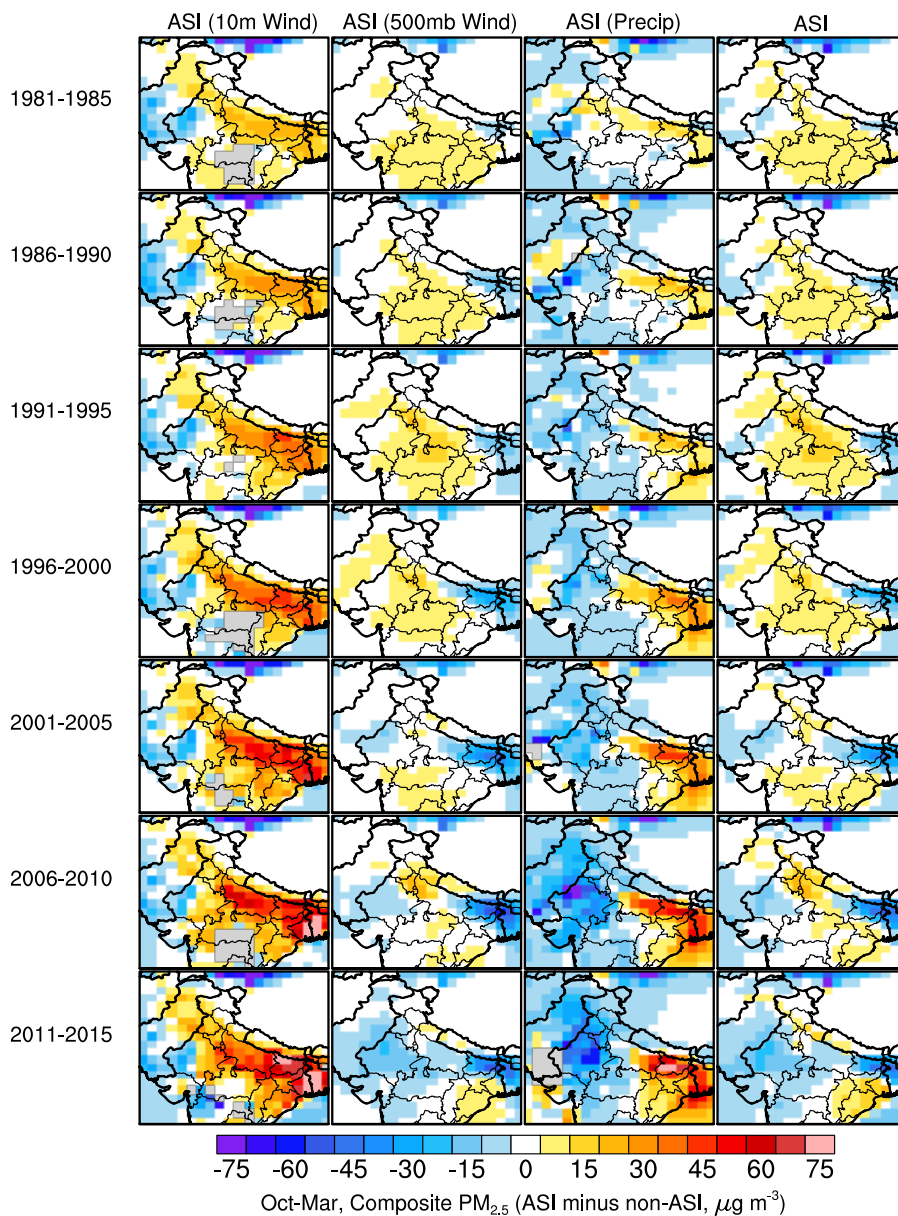

**Figure S13.** Composite of AM4-CMIP6 wet PM<sub>2.5</sub> on days when ASI components (first column) 10-m wind speed, (second column) 500 mb wind speed, (third column) precipitation, and (last column) total ASI are met minus days when they are not for October–March over seven 5-year intervals (rows). Gray areas are locations where a composite cannot be constructed since 100% of the days are considered stagnant.

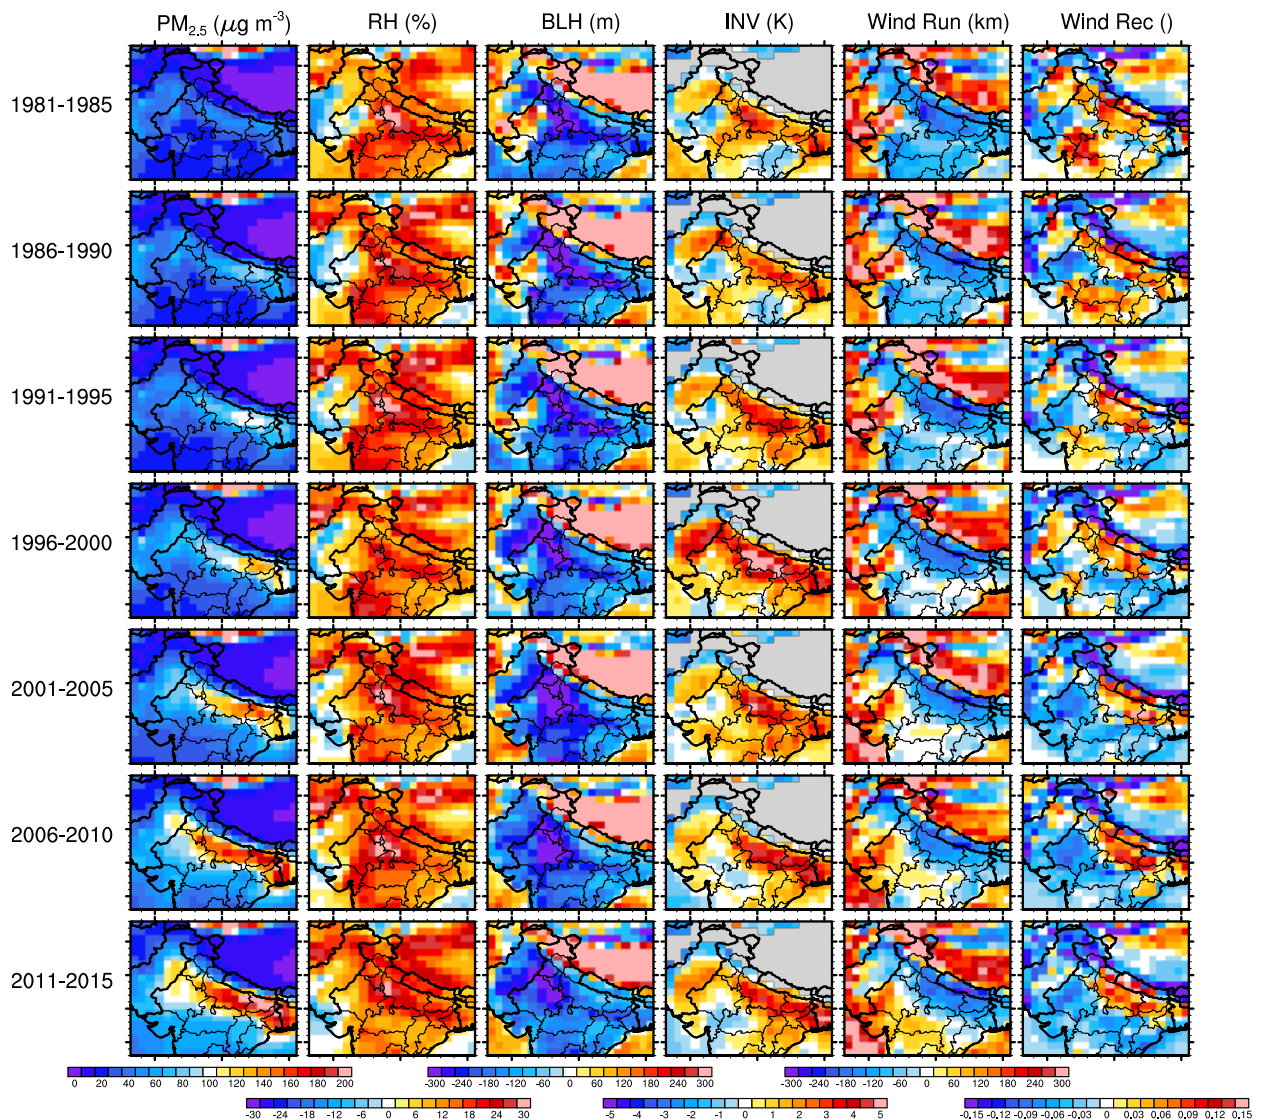

October - March, 50 Worst Days minus 50 Best Days

**Figure S14.** Composite of the 50 days with the highest PM<sub>2.5</sub> abundance minus the 50 days with the lowest for October – March over seven 5-year intervals (rows) for (first column) PM<sub>2.5</sub> (wet,  $\mu\text{g m}^{-3}$ ), (second column) relative humidity (%), (third column) boundary layer height (m), (fourth column) temperature inversion strength (K), (fifth column) wind run (km), and (sixth column) wind recirculation (unitless) for AM4-CMIP6-wet.
